# Supplementary material for: Hybrid sequencing resolves two germline ultra-complex chromosomal rearrangements consisting of 137 breakpoint junctions in a single carrier
Source: PubMed Central journal article supplement (PMC8052244; doi:10.1007/s00439-020-02242-3), 2020-12-14
Supplement: 439_2020_2242_MOESM1_ESM.pdf [file 439_2020_2242_MOESM1_ESM.pdf]

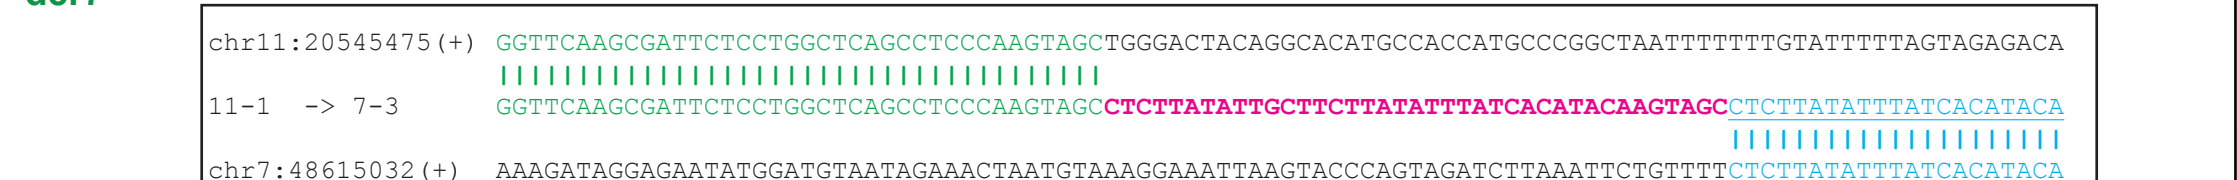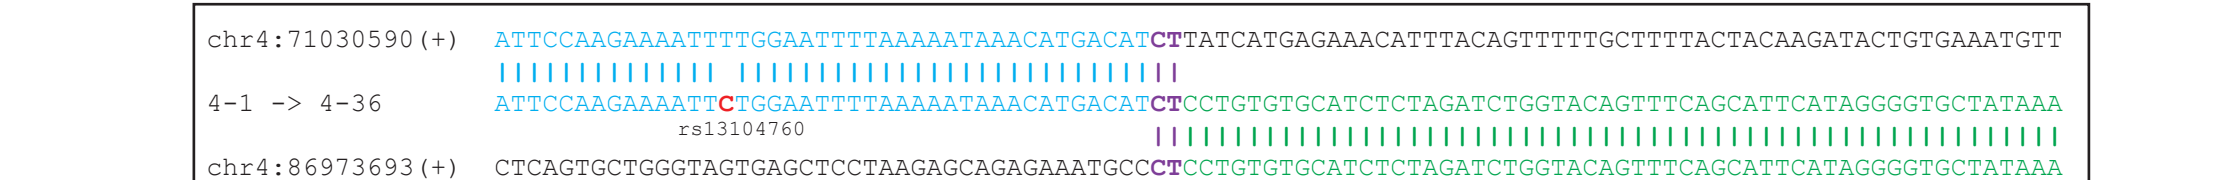

der7

Genomic coordinates and sequences for der7 (chr1:12054970 to chr1:12054985). Includes a diagram of the gene structure with exons 1-7 and a table of coordinates and sequences.

der5

Genomic coordinates and sequences for der5 (chr4:17030590 to chr4:17030615). Includes a diagram of the gene structure with exons 1-6 and a table of coordinates and sequences.

der1

Genomic coordinates and sequences for der1 (chr7:12047037 to chr7:12047055). Includes a diagram of the gene structure with exons 1-7 and a table of coordinates and sequences.

der6

Genomic coordinates and sequences for der6 (chr4:19328125 to chr4:19328145). Includes a diagram of the gene structure with exons 1-5 and a table of coordinates and sequences.

der21

Genomic coordinates and sequences for der21 (chr4:18127466 to chr4:18127505). Includes a diagram of the gene structure with exons 1-7 and a table of coordinates and sequences.

der3

Genomic coordinates and sequences for der3 (chr4:18924201 to chr4:18924215). Includes a diagram of the gene structure with exons 1-4 and a table of coordinates and sequences.

der19

Genomic coordinates and sequences for der19 (chr9:12894790 to chr9:12894815). Includes a diagram of the gene structure with exons 1-5 and a table of coordinates and sequences.

der4

Genomic coordinates and sequences for der4 (chr4:18932462 to chr4:18932475). Includes a diagram of the gene structure with exons 1-5 and a table of coordinates and sequences.

derx

Genomic coordinates and sequences for derx (chr21:2795967 to chr21:2795975). Includes a diagram of the gene structure with exons 1-5 and a table of coordinates and sequences.

der5

Genomic coordinates and sequences for der5 (chr4:1894644 to chr4:1894655). Includes a diagram of the gene structure with exons 1-5 and a table of coordinates and sequences.
